# Supplementary figures and images for: The role of membrane microdomains in shaping β2-adrenergic receptor-mediated cAMP dynamics
Source: Royal Society of Chemistry journal article supplement (doi:10.1039/b823243a), 2009-05-26

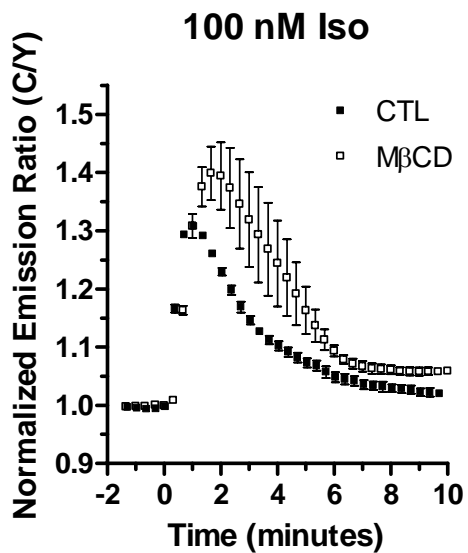

Supplementary Figure 1

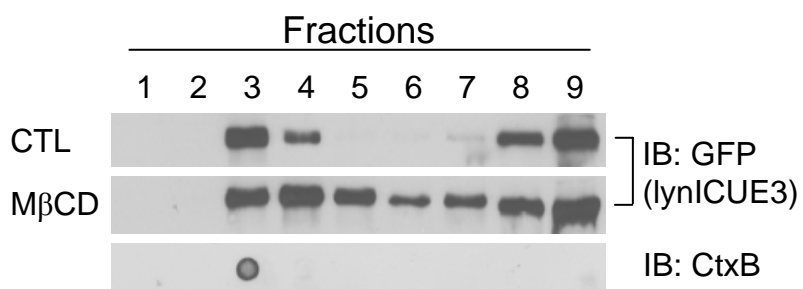

Supplementary Figure 2

Supplement: b823243a.pdf [file b823243a.pdf]
